# Supplementary material for: Global Citizenship Competencies of Filipino Students: Using Machine Learning to Explore the Structure of Cognitive, Affective, and Behavioral Competencies in the 2019 Southeast Asia Primary Learning Metrics
Source: MDPI journal article supplement (doi:10.3390/educsci12080547), 2022-08-12

Supplementary Files

Summary statistics for predictor variables

Tables showing the frequency count of the unique categories for each variable. These values were transformed to numerical values prior to machine learning model training.

| Variable | Some | A lot | A little | Nothing | Omitted | Invalid |
|----------|------|-------|----------|---------|---------|---------|
| GC01Q01  | 2217 | 1960  | 1095     | 550     | 172     | 82      |
| GC01Q02  | 1843 | 1770  | 1356     | 774     | 253     | 80      |
| GC01Q03  | 2050 | 1438  | 1441     | 788     | 267     | 92      |
| GC01Q04  | 1848 | 1541  | 1466     | 830     | 302     | 89      |
| GC01Q05  | 1974 | 1702  | 1423     | 608     | 293     | 76      |
| GC01Q06  | 1697 | 1930  | 1215     | 745     | 413     | 76      |
| GC01Q07  | 1705 | 1401  | 1454     | 1001    | 434     | 81      |
| GC01Q08  | 1864 | 1588  | 1339     | 819     | 398     | 68      |
| GC01Q09  | 1756 | 1937  | 1118     | 849     | 365     | 51      |
| GC01Q10  | 1956 | 1556  | 1488     | 667     | 323     | 86      |
| GC01Q11  | 1723 | 2200  | 1137     | 544     | 379     | 93      |

| Variable | Strongly Agree | Agree | Disagree | Strongly Disagree | Omitted | Invalid |
|----------|----------------|-------|----------|-------------------|---------|---------|
| GC03Q01  | 2840           | 2196  | 452      | 313               | 195     | 80      |
| GC03Q02  | 1469           | 1896  | 1465     | 852               | 309     | 85      |
| GC03Q03  | 1404           | 2130  | 1474     | 657               | 307     | 104     |
| GC03Q04  | 1638           | 2454  | 993      | 591               | 291     | 109     |
| GC03Q05  | 1195           | 1920  | 1674     | 878               | 334     | 75      |
| GC03Q06  | 1136           | 1668  | 1696     | 1175              | 359     | 42      |
| GC04Q06  | 1621           | 2316  | 1311     | 464               | 262     | 102     |
| GC04Q07  | 2193           | 1962  | 992      | 565               | 321     | 43      |
| GC05Q01  | 1663           | 2472  | 1105     | 583               | 182     | 71      |
| GC05Q02  | 1581           | 2691  | 1113     | 375               | 233     | 83      |
| GC05Q03  | 1172           | 1819  | 1506     | 1196              | 294     | 89      |
| GC05Q06  | 1526           | 2280  | 1277     | 613               | 300     | 80      |
| GC05Q07  | 2050           | 2200  | 900      | 542               | 315     | 69      |

| Variable | Very worried | Quite worried | Not very worried | Not at all worried | Omitted | Invalid |
|----------|--------------|---------------|------------------|--------------------|---------|---------|
| GC06Q01  | 2075         | 1209          | 1140             | 1302               | 262     | 88      |
| GC06Q02  | 1231         | 1642          | 1685             | 1084               | 339     | 95      |
| GC06Q03  | 1373         | 1679          | 1486             | 1060               | 359     | 119     |
| GC06Q04  | 1786         | 1494          | 1276             | 1080               | 355     | 85      |
| GC06Q05  | 1942         | 1386          | 1227             | 1002               | 403     | 116     |
| GC06Q06  | 2070         | 1318          | 1241             | 919                | 438     | 89      |
| GC06Q07  | 1784         | 1511          | 1240             | 1012               | 460     | 69      |
| GC06Q08  | 2217         | 1272          | 1164             | 946                | 429     | 48      |

| Variable | I will do this | I might do this | I might not do this | I will not do this | Omitted | Invalid |
|----------|----------------|-----------------|---------------------|--------------------|---------|---------|
| GC07Q01  | 2844           | 1687            | 619                 | 636                | 197     | 92      |
| GC07Q02  | 2073           | 1910            | 943                 | 806                | 267     | 77      |
| GC07Q03  | 3160           | 1520            | 700                 | 342                | 257     | 97      |
| GC07Q04  | 2509           | 1692            | 855                 | 641                | 289     | 90      |
| GC07Q05  | 2743           | 1656            | 796                 | 504                | 311     | 66      |
| GC07Q06  | 2798           | 1703            | 727                 | 472                | 322     | 54      |

| Variable | Strongly Agree | Agree | Disagree | Strongly Disagree | Omitted | Invalid |
|----------|----------------|-------|----------|-------------------|---------|---------|
| GC08Q01  | 1258           | 1814  | 1616     | 1043              | 257     | 88      |
| GC08Q02  | 1536           | 2182  | 1292     | 686               | 301     | 79      |
| GC08Q03  | 2123           | 2128  | 983      | 419               | 304     | 119     |
| GC08Q04  | 1960           | 2171  | 867      | 641               | 349     | 88      |
| GC08Q05  | 1839           | 2129  | 1038     | 657               | 361     | 52      |

| Variable | Very likely | Quite likely | Not very likely | Not at all likely | Omitted | Invalid |
|----------|-------------|--------------|-----------------|-------------------|---------|---------|
| GC09Q01  | 3943        | 1203         | 359             | 267               | 215     | 89      |
| GC09Q02  | 2420        | 1892         | 891             | 494               | 286     | 93      |
| GC09Q03  | 2497        | 1712         | 1025            | 442               | 281     | 119     |
| GC09Q08  | 1774        | 1706         | 1353            | 843               | 334     | 66      |
| GC09Q09  | 2028        | 1680         | 1133            | 812               | 375     | 48      |

| Variable | Very important | Quite important | Not very important | Not at all important | Omitted | Invalid |
|----------|----------------|-----------------|--------------------|----------------------|---------|---------|
| GC10Q01  | 3282           | 1668            | 451                | 271                  | 320     | 83      |
| GC10Q02  | 2968           | 1655            | 654                | 322                  | 395     | 82      |
| GC10Q03  | 2643           | 1676            | 870                | 390                  | 378     | 119     |
| GC10Q04  | 2060           | 1841            | 1072               | 606                  | 391     | 106     |
| GC10Q05  | 2495           | 1747            | 884                | 467                  | 395     | 88      |
| GC10Q06  | 3170           | 1307            | 675                | 389                  | 449     | 86      |
| GC10Q07  | 2752           | 1560            | 784                | 444                  | 450     | 86      |
| GC10Q08  | 1745           | 1988            | 1167               | 636                  | 467     | 73      |
| GC10Q09  | 1844           | 1767            | 1166               | 796                  | 446     | 57      |

Outputs of SHAP Analysis

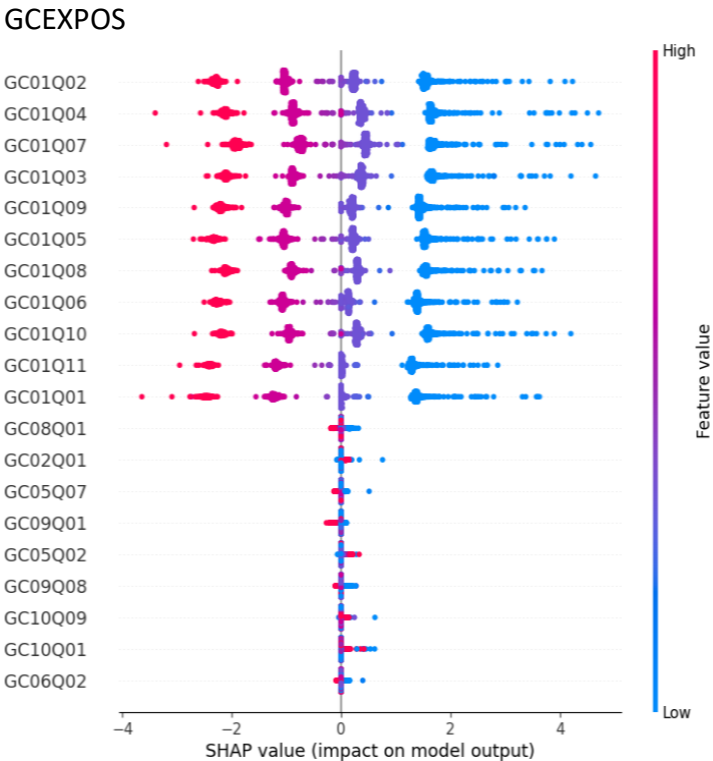

GCLEARN

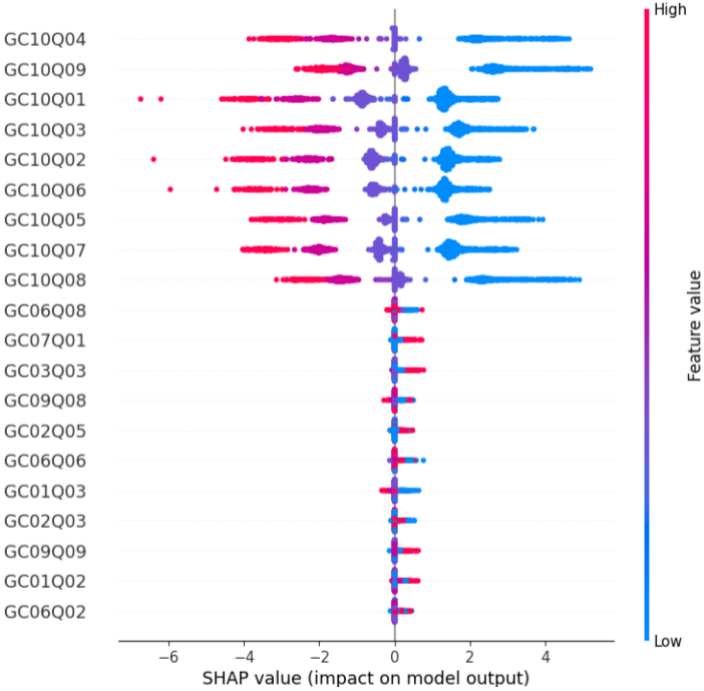

GLOBCON

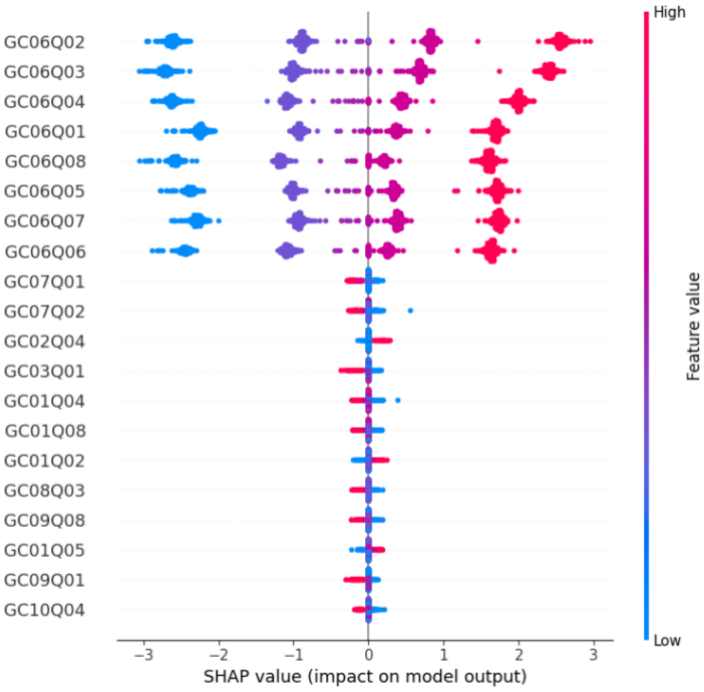

ASIDENT

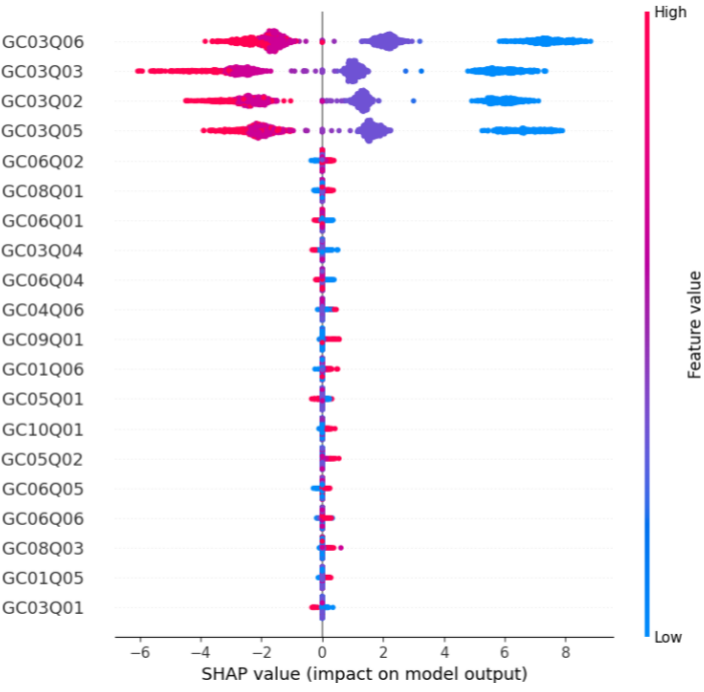

GCINTEN

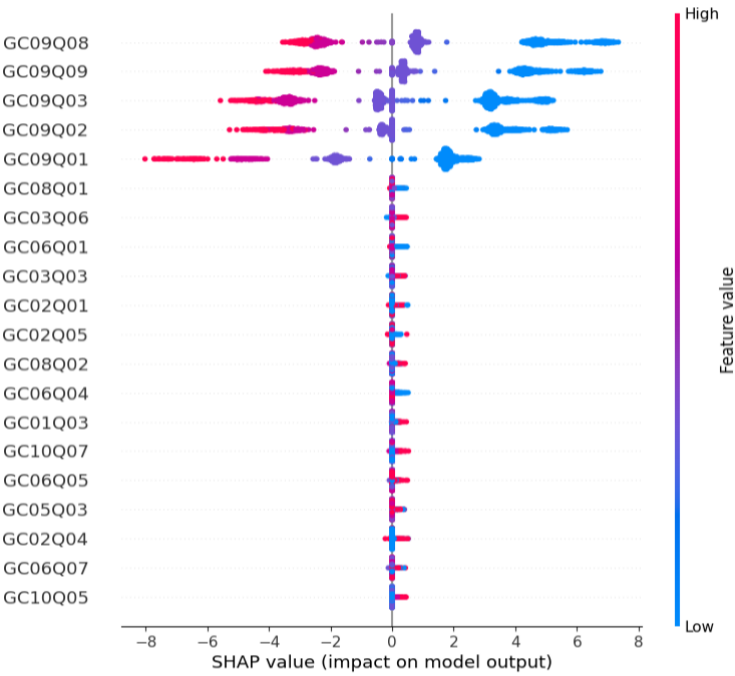

EXPBEHA

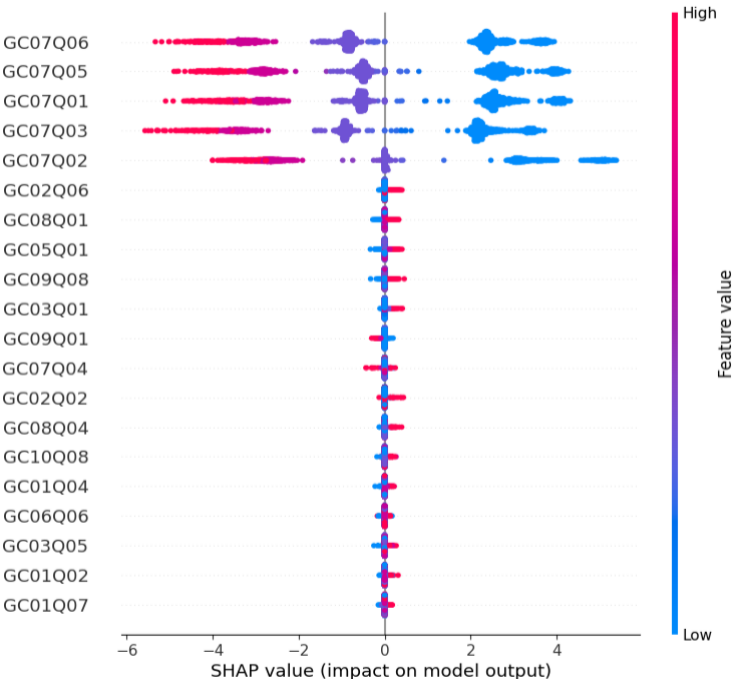

Supplement: s1 [file s1]
